# Supplementary material for: Bovine Serum Albumin-Based Nanoparticles: Preparation, Characterization, and Antioxidant Activity Enhancement of Three Main Curcuminoids from Curcuma longa
Source: MDPI journal article supplement (doi:10.3390/molecules27092758), 2022-04-25
Supplement: s1 [file s1]

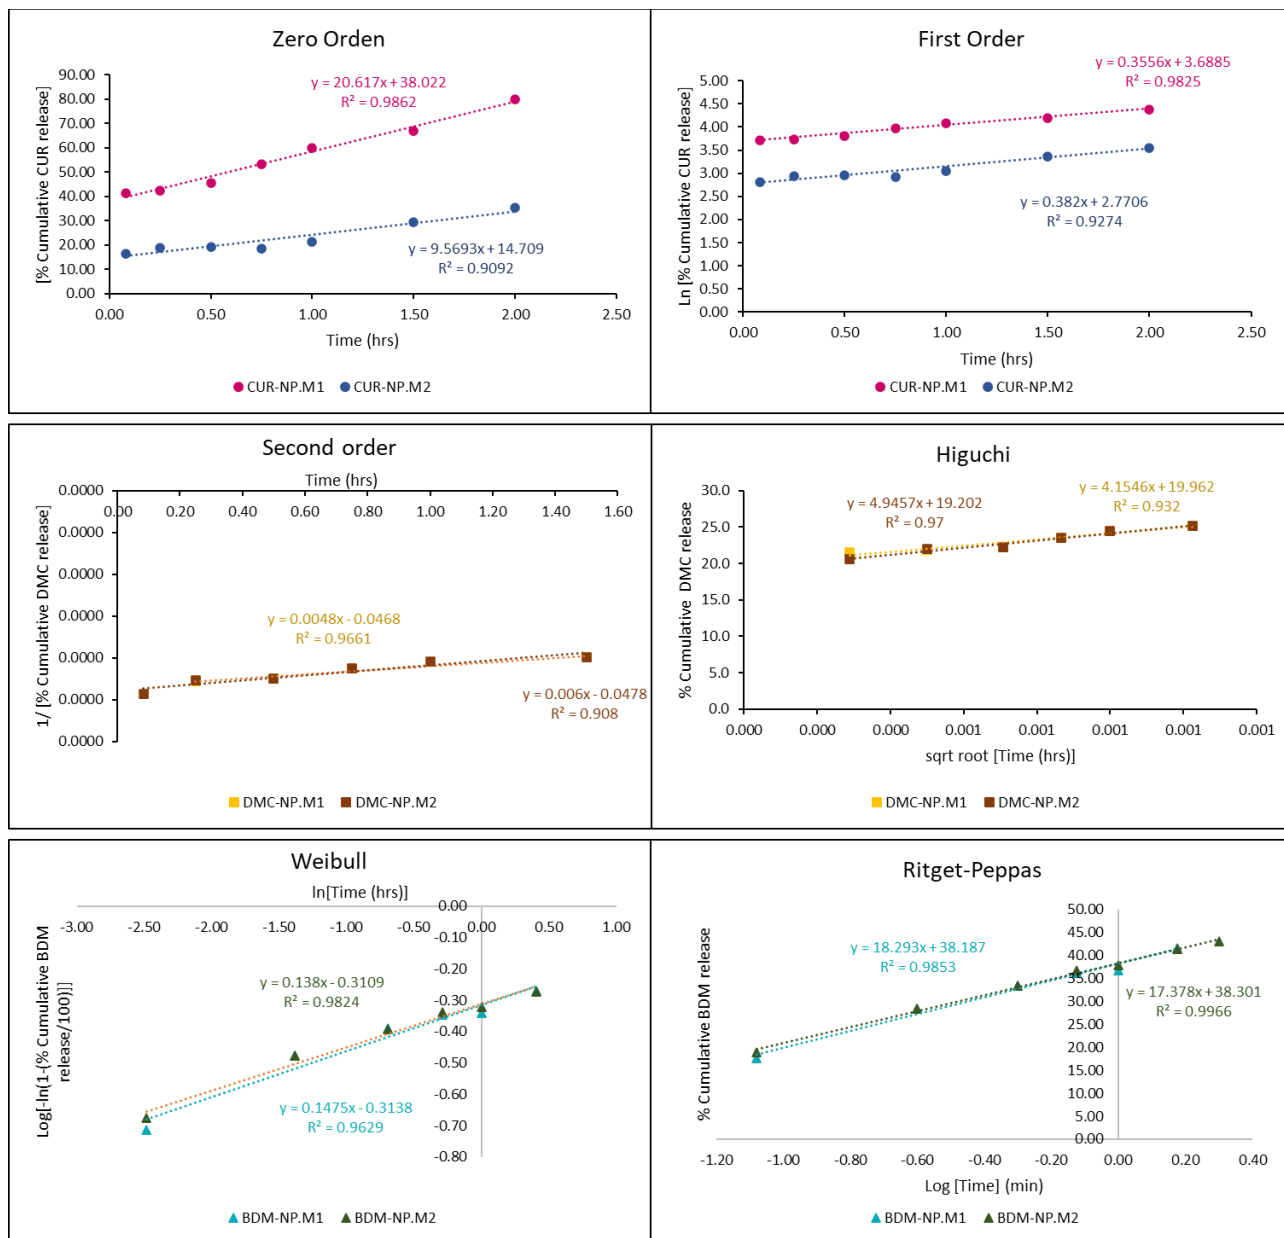

**Figure S1.** Fitting models of best release kinetics in the experimental data for CUR-NP, DMC-NP, and BDM-NP in M<sub>1</sub> and M<sub>2</sub> in six different kinetic models: zero order, first order, second order, Ritget-Peppas, Higuchi and Weibull
